# Supplementary material for: Pharmacokinetic Study of Bioactive Flavonoids in the Traditional Japanese Medicine Keigairengyoto Exerting Antibacterial Effects against Staphylococcus aureus
Source: PubMed Central journal article supplement (PMC5855550; doi:10.3390/ijms19020328), 2018-01-23
Supplement: ijms-19-00328-s001.pdf [file ijms-19-00328-s001.pdf]

# Pharmacokinetic Study of Bioactive Flavonoids in the Traditional Japanese Medicine Keigairengyoto Exerting Antibacterial Effects against *Staphylococcus aureus*

Takashi Matsumoto <sup>1,\*</sup>, Atsushi Kaneko <sup>1</sup>, Junichi Koseki <sup>1</sup>, Yosuke Matsubara <sup>1</sup>, Setsuya Aiba <sup>2</sup> and Kenshi Yamasaki <sup>2</sup>

<sup>1</sup> Tsumura Kampo Research Laboratories, Kampo Research & Development Division, Tsumura & Co., Ibaraki 300-1192, Japan; kaneko\_atsushi@mail.tsumura.co.jp (A.K.); htkj9626m@mineo.jp (J.K.); matsubara\_yousuke@mail.tsumura.co.jp (Y.M.)

<sup>2</sup> Department of Dermatology, Tohoku University Graduate School of Medicine, Miyagi 980-8574, Japan; saiba@med.tohoku.ac.jp (S.A.); kyamasaki@med.tohoku.ac.jp (K.Y.)

\* Correspondence: matsumoto\_takashi@mail.tsumura.co.jp; Tel.: +81-29-889-3852; Fax: +81-29-889-3870

**Table S1.** Methods of LC-MS/MS: Ion parameters of test compounds.

| Compound          | Q1<br>( <i>m/z</i> ) | Q3<br>( <i>m/z</i> ) | DP<br>(volts<br>) | CE<br>(volts<br>) | CXP<br>(volts<br>) | System<br>no.-metho<br>d no. | Analyzed sample          |
|-------------------|----------------------|----------------------|-------------------|-------------------|--------------------|------------------------------|--------------------------|
| Glycyrrhizic acid | 840.37               | 453.3                | 31                | 43                | 8                  | 1-1                          | Plasma_1                 |
| Glycyrrhetic acid | 471.23<br>4          | 91                   | 11                | 111               | 16                 | 1-1                          | Plasma_1                 |
| Wogonoside        | 459.17<br>4          | 267.9                | -75               | -40               | -15                | 1-2                          | Plasma_1 and<br>plasma_2 |
| Baicalin          | 447.05               | 271.1                | 66                | 25                | 18                 | 2-1                          | Plasma_1                 |
| Baicalin          | 447.05               | 123                  | 66                | 77                | 12                 | 2-1                          | Plasma_2                 |
| Berberine         | 336.1                | 320                  | 101               | 39                | 10                 | 2-1                          | Plasma_1 and<br>plasma_2 |
| Hesperetin        | 300.98<br>2          | 163.8                | -140              | -34               | -23                | 1-2                          | Plasma_1 and<br>plasma_2 |
| Luteolin          | 287.00<br>5          | 153                  | 116               | 43                | 14                 | 2-1                          | Plasma_2                 |
| Luteolin          | 285.05<br>8          | 132.9                | -110              | -48               | -17                | 1-2                          | Plasma_1                 |
| Wogonin           | 283.15<br>6          | 268.01<br>5          | -105              | -24               | -29                | 1-2                          | Plasma_1 and<br>plasma_2 |
| Naringenin        | 271.23<br>5          | 150.9                | -65               | -24               | -17                | 1-2                          | Plasma_1 and<br>plasma_2 |
| Apigenin          | 271.10<br>3          | 153                  | 111               | 43                | 12                 | 2-1                          | Plasma_2                 |
| Baicalein         | 271.08<br>8          | 123                  | 101               | 45                | 10                 | 2-1                          | Plasma_1 and<br>plasma_2 |
| Apigenin          | 269.23<br>2          | 116.9                | -120              | -42               | -15                | 1-2                          | Plasma_1                 |

|                    |             |       |      |     |     |     |                          |
|--------------------|-------------|-------|------|-----|-----|-----|--------------------------|
| Genistein          | 269.21<br>9 | 132.9 | -120 | -40 | -13 | 1-2 | Plasma_1 and<br>plasma_2 |
| Liquiritigenin     | 255.03<br>7 | 119   | -65  | -30 | -11 | 1-2 | Plasma_1 and<br>plasma_2 |
| Atropine (IS)      | 290.01<br>9 | 124.1 | 111  | 31  | 14  | 1-1 | Plasma_1                 |
| Niflumic acid (IS) | 283.1       | 265.1 | 101  | 31  | 20  | 2-1 | Plasma_1 and<br>plasma_2 |
| Niflumic acid (IS) | 280.82<br>6 | 236.8 | -60  | -30 | -16 | 1-2 | Plasma_1 and<br>plasma_2 |

†: System no.-method no. is linked to number described in Table S2. We used two LC-MS/MS systems in this study as follows: system no. 1, a TripleQuad6500 (AB SCIEX, Tokyo, Japan) equipped with an Agilent 1290 system (Agilent Technologies, Tokyo, Japan); system no. 2, an API4000 triple quadrupole mass spectrometer (AB SCIEX) equipped with an Agilent 1100 system (Agilent Technologies). Plasma\_no.: Plasma\_1, plasma without  $\beta$ -glucuronidase treatment; plasma\_2, plasma with  $\beta$ -glucuronidase treatment. DP; declustering potential, CE; collision energy, CXP; collision cell exit potential.

**Table S2.** LC-MS/MS Methods: HPLC Conditions.

| System no.-method no. | HPLC condition                                                                                                                                                                                                                                                                                                                                                                                                                                                                                                                                                                                                                                                                                                                                                                                           |
|-----------------------|----------------------------------------------------------------------------------------------------------------------------------------------------------------------------------------------------------------------------------------------------------------------------------------------------------------------------------------------------------------------------------------------------------------------------------------------------------------------------------------------------------------------------------------------------------------------------------------------------------------------------------------------------------------------------------------------------------------------------------------------------------------------------------------------------------|
| 1-1                   | <p>Column: CAPCELL CORE ADME (100 × 2.1 mm I.D., 2.7-<math>\mu</math>m particle size; Shiseido, Tokyo, Japan)</p> <p>Guard column: CORE ADME EXP cartridge (5 × 2.1 mm I.D., 2.7-<math>\mu</math>m particle size; Shiseido)</p> <p>Mobile phase (A) 10 mmol/L ammonium acetate, (B) methanol</p> <p>Gradient elution program (% B in A):<br/>0–1 min, 30%; 1–3 min, 30–50%; 3–10 min, 50–95%; 10–15 min, 95%; 15–15.01 min, 95–30%; 15.01–20 min, 30%</p> <p>Other conditions were: flow rate, 0.3 mL/min; column temperature, 40°C</p> <p>Column: Ascentis Express RP-amide column (100 × 2.1 mm I.D., 2.7-<math>\mu</math>m particle size; Supelco, Bellefonte, PA)</p> <p>Guard column: Ascentis Express RP-Amide guard cartridge (5 × 2.1 mm I.D., 2.7-<math>\mu</math>m particle size; Supelco)</p> |
| 1-2                   | <p>Mobile phase (A) 0.2 vol % acetic acid, (B) acetonitrile containing 0.2 vol % acetic acid</p> <p>Gradient elution program (% B in A):<br/>0–5 min, 7%; 5–20 min, 7–95%; 20–20.01 min, 95–7%; 20.01–25 min, 7%</p> <p>Other conditions were: flow rate, 0.35 mL/min; column temperature, 40°C</p> <p>Column: Ascentis Express RP-amide column (100 × 2.1 mm I.D., 2.7-<math>\mu</math>m particle size; Supelco)</p> <p>Guard column: Ascentis Express RP-Amide guard cartridge (5 × 2.1 mm I.D., 2.7-<math>\mu</math>m particle size; Supelco)</p>                                                                                                                                                                                                                                                     |
| 2-1                   | <p>Mobile phase (A) 0.2 vol % formic acid, (B) methanol containing 0.2 vol % formic acid</p> <p>Gradient elution program (% B in A):<br/>0–5 min, 7%; 5–20 min, 7–95%; 20–20.01 min, 95–7%; 20.01–25 min, 7%</p> <p>Other conditions were: flow rate, 0.35 mL/min; column temperature, 40°C</p>                                                                                                                                                                                                                                                                                                                                                                                                                                                                                                          |

LC-MS/MS system: system no. 1, a TripleQuad6500 (AB SCIEX) equipped with an Agilent 1290 system (Agilent Technologies); system no. 2, an API4000 triple quadrupole mass spectrometer (AB SCIEX) equipped with an Agilent 1100 system (Agilent Technologies).
